# Supplementary material for: Sonochemically-fabricated Ga@C-dots@Ga nanoparticle-aided neural growth
Source: Royal Society of Chemistry journal article supplement (doi:10.1039/c6tb02508k), 2017-01-01
Supplement: c6tb02508k1.pdf [file c6tb02508k1.pdf]

## Supporting information:

# The Sonochemically-Fabricated Ga@C-dots@Ga Nanoparticle-Aided Neural Growth

Ifat Nissan<sup>#a,c</sup>, Vijay Bhooshan Kumar<sup>#a,c</sup>, Ze'ev Porat<sup>d,e</sup>, Darko Makovec<sup>f</sup>, Orit Shefi<sup>b,c,\*</sup>, and  
Aharon Gedanken<sup>a,c,\*</sup>

Note: # Vijay Bhooshan Kumar and Ifat Nissan have equally contributed to this work

<sup>a</sup>Department of Chemistry, Bar-Ilan University, Ramat Gan 5290002, Israel

<sup>b</sup>Faculty of Engineering, Bar-Ilan University, Ramat Gan 5290002, Israel

<sup>c</sup>Institute for Nanotechnology and Advanced Materials, Bar-Ilan University, Ramat Gan,  
5290002, Israel

<sup>d</sup>Institute of Applied Research, Ben-Gurion University of the Negev, Be'er Sheva 84105, Israel

<sup>e</sup>Division of Chemistry, Nuclear Research Center-Negev, Be'er Sheva 84190, Israel

<sup>f</sup>Department for Materials Synthesis, Jozef Stefan Institute, Jamova 39, SI-1000 Ljubljana  
Slovenia.

\*Corresponding authors' e-mail addresses: [gedanken@biu.ac.il](mailto:gedanken@biu.ac.il) (A.G.) and [orit.shefi@biu.ac.il](mailto:orit.shefi@biu.ac.il)

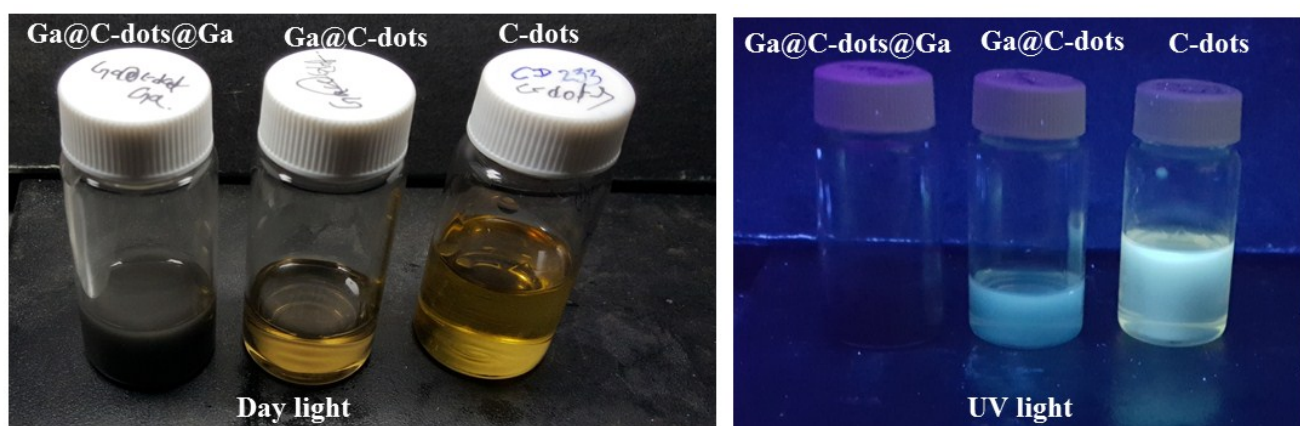

**Figure S1:** Photographs of a suspension of the Ga@C-dots@Ga, Ga@C-dots, C-dots illuminated by (A) UV light (365 nm) and (B) daylight

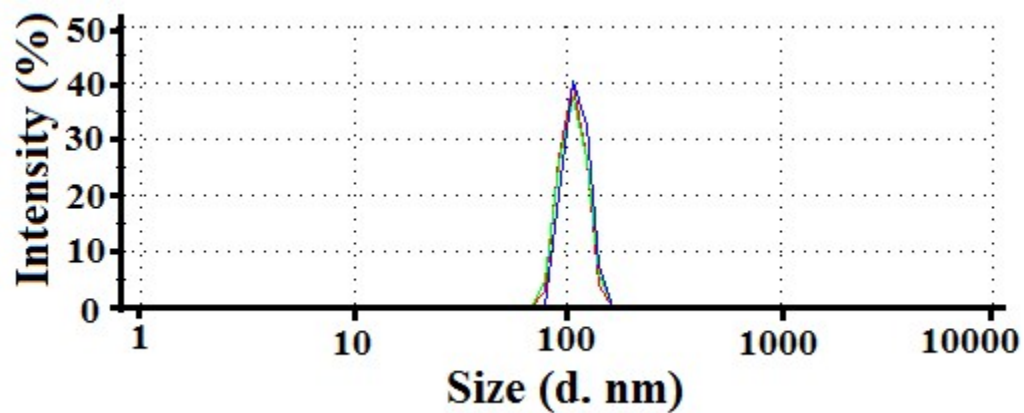

Fig. S2: DLS pattern of sonochemical deposition of Ga@C-dots@Ga NPs (Three curve represent the repeatability 3 times)

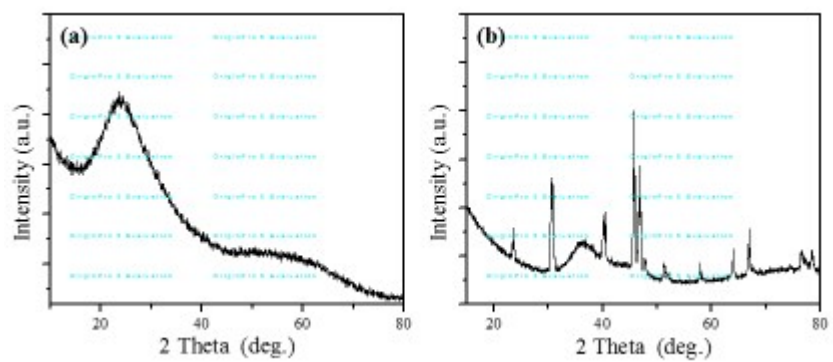

Fig. S3: XRD pattern of (a) C-dots and (b) Ga NPs.

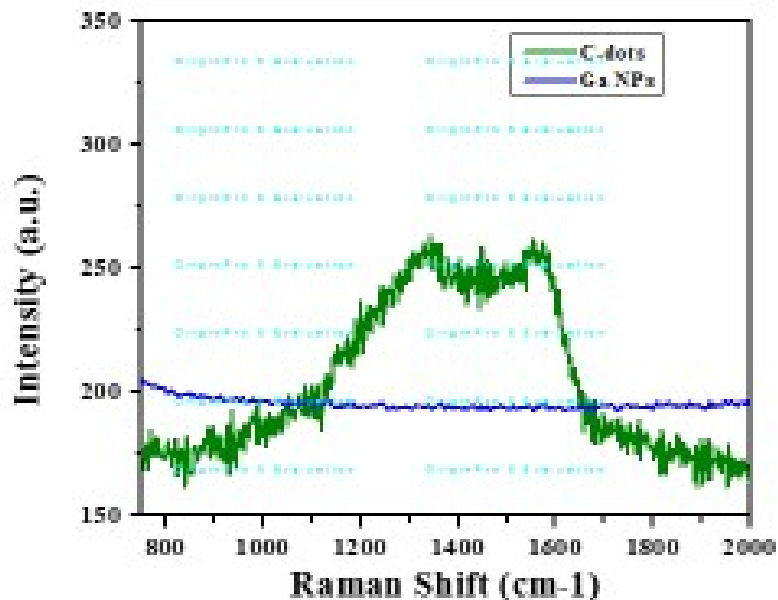

Fig. S4: The Raman spectra of Ga NPs (blue) and C-dots (Green).

The product of this procedure was Ga@C-dots@Ga nanoparticles deposited on the glass substrate. This product was washed with water and ethanol to remove bigger particles or unattached Ga@C-dots@Ga NPs, and dried in a vacuum chamber. **Fig. S5a,b** presents a HRSEM image of the Ga@C-dots@Ga deposition on the glass substrate for 3 minutes' sonication and only few particles were observed. **Fig. S5c-d** shows HRSEM images of substrates coated with Ga@C-dots@Ga NPs, demonstrating the effect of reaction time and concentration of Ga@C-dots@Ga NPs on the density of the coated particles. We have demonstrated the deposition of Ga@C-dots on glass substrate is a function of sonication time (3 mins, 10 mins, 20 minutes). The optimum deposition was observed in 20 minutes' sonication at 30 % amplitude. **Fig. S5g and 5h** presents a HRSEM images of the Ga@C-dots and C-dots deposition on the glass-substrate, respectively. The typical size of these features is between ~5-10 nm, which is similar to the size of the individual C-dots that were observed before (TEM).

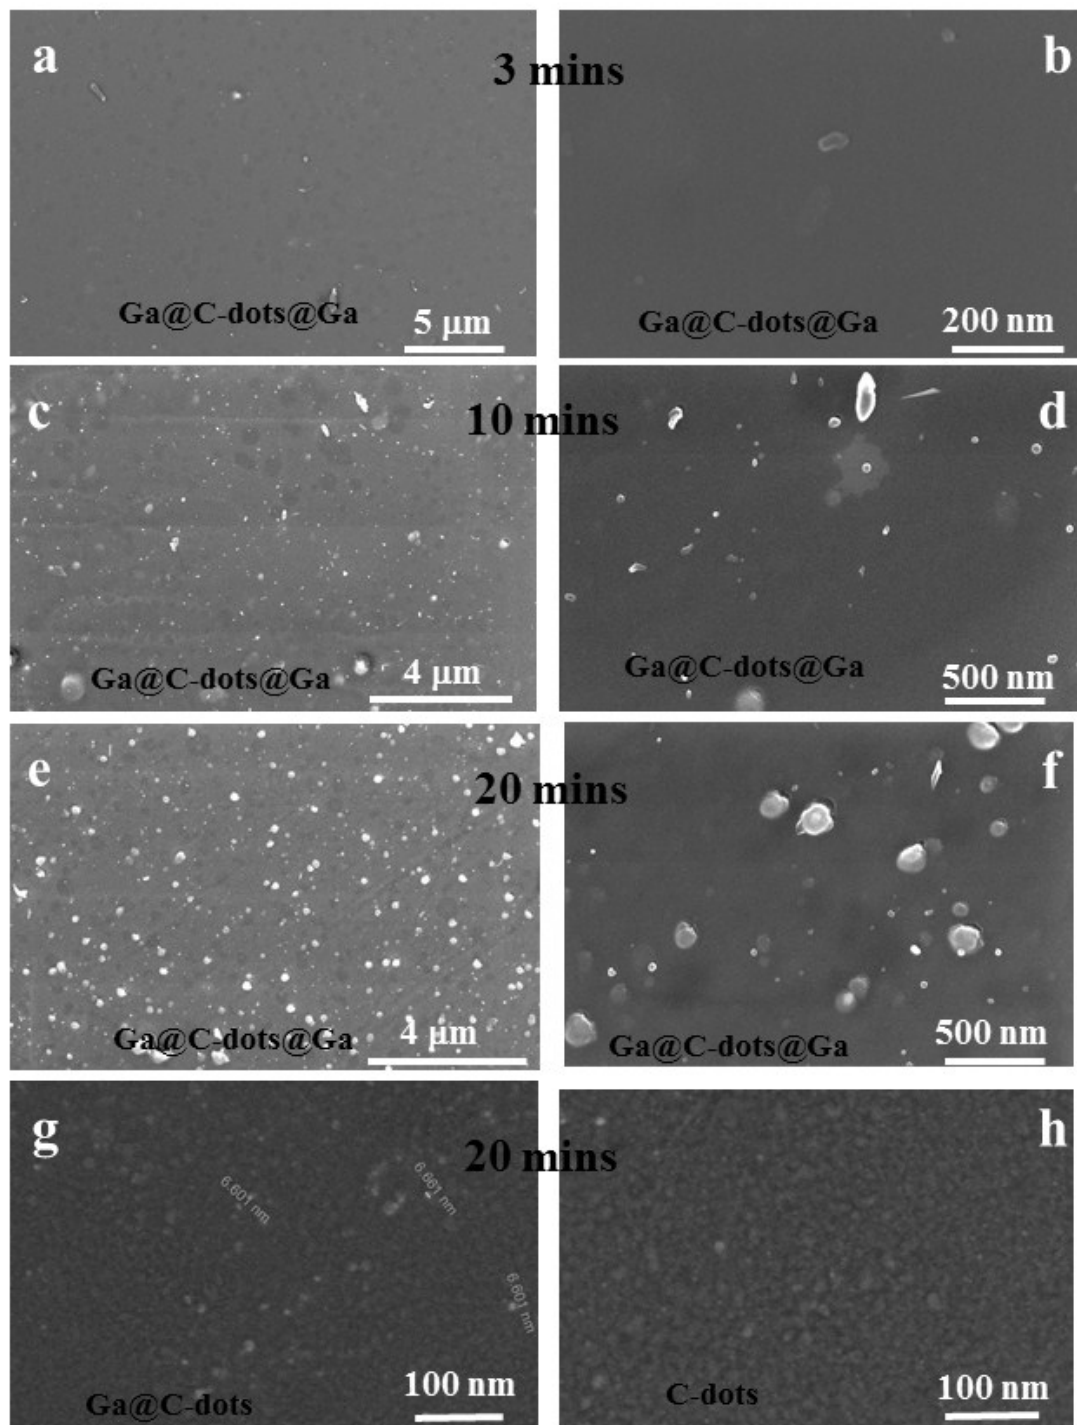

Figure S5. Sonochemical deposition of Ga@C-dots@Ga NPs on glass substrate (a, b) minutes, (c, d) 10 minutes, (e, f) 20 minutes, (g) Ga@C-dots (h) C-dots for 20 mins.

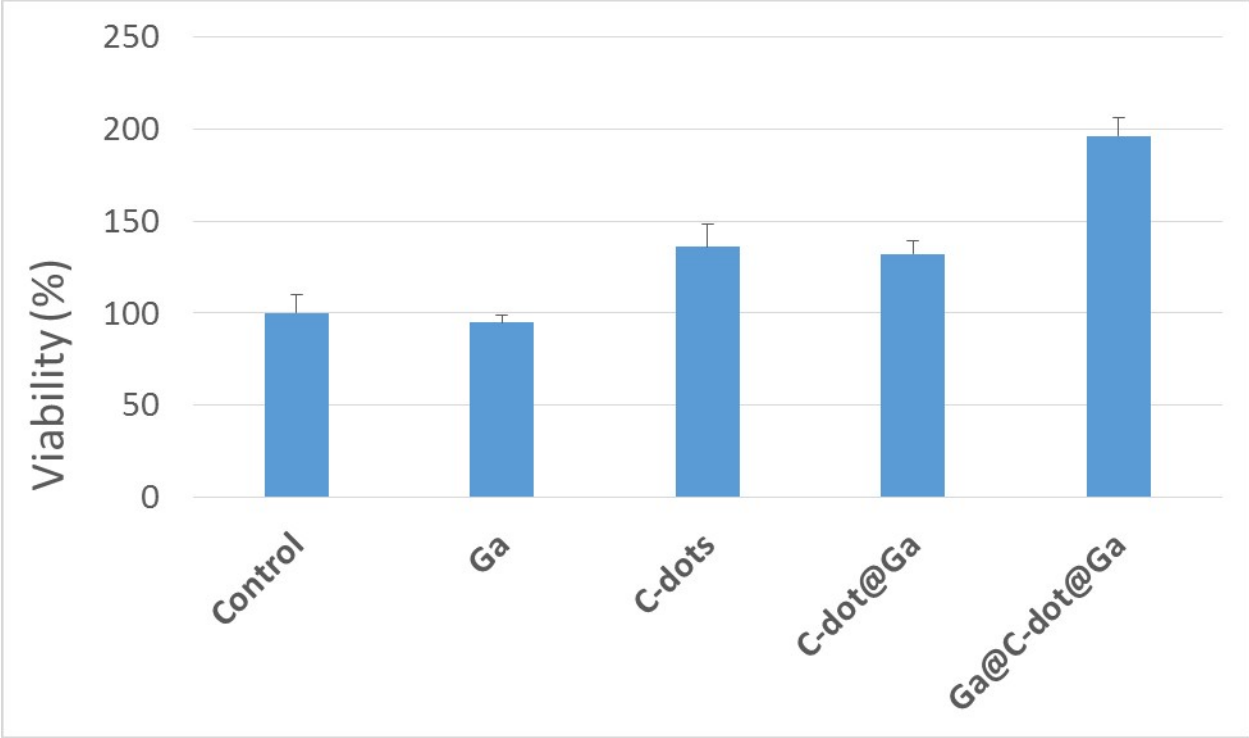

Fig. S6: Viability test for glass alone (control), Ga NPs, C-dots, Ga@C-dots, Ga@C-dots@Ga modified glass substrate.

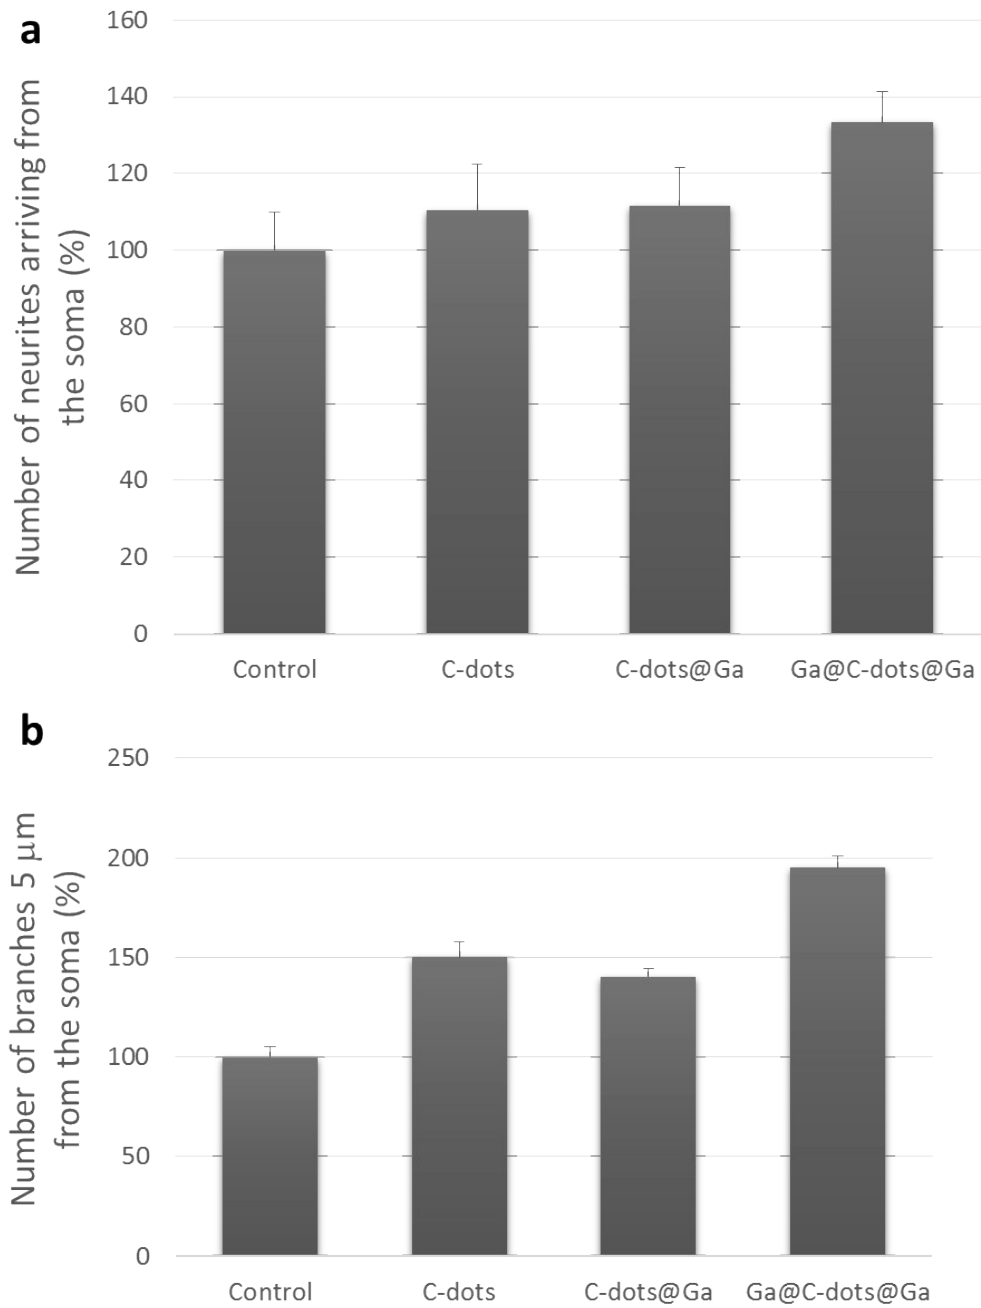

Fig. S7: (a) Number of neurites arriving from the soma, (b) Number of branches 5  $\mu\text{m}$  from the soma of cells that grow on the different substrates (glass alone, C-dots, Ga@C-dots, Ga@C-dots@Ga modified glass substrate).
